# Supplementary material
Source: PubMed Central journal article supplement (PMC4128683)
Supplement: NIHMS618054-supplement-Supp_Data.pdf [file NIHMS618054-supplement-Supp_Data.pdf]

## SUPPORTING INFORMATION

### Solution Structure of a Sponge-Derived Cystine Knot Peptide and Its Notable Stability

Huayue Li<sup>†</sup>, Mingzhi Su<sup>†</sup>, Mark T. Hamann<sup>‡</sup>, John J. Bowling<sup>‡,§</sup>, Hyung Sik Kim<sup>⊥</sup>, Jee H.  
Jung<sup>†,\*</sup>

<sup>†</sup>College of Pharmacy, Pusan National University, Busan 609-735, Republic of Korea

<sup>‡</sup>Department of Pharmacognosy, School of Pharmacy, The University of Mississippi, Oxford,  
Mississippi 38677, USA

<sup>§</sup>Present address: Department of Chemical Biology and Therapeutics, St. Jude Children's  
Research Hospital, Memphis, Tennessee 38105, USA

<sup>⊥</sup>College of Pharmacy, Sungkyunkwan University, Suwon 440-746, Republic of Korea

## Contents

**Figure S1.**  $^1\text{H}$  NMR spectrum of ASPE in  $\text{CD}_3\text{OH}$ .

**Figure S2.** DQF-COSY spectrum of ASPE in  $\text{CD}_3\text{OH}$ .

**Figure S3.** TOCSY spectrum of ASPE in  $\text{CD}_3\text{OH}$ .

**Figure S4.** NOESY spectrum of ASPE in  $\text{CD}_3\text{OH}$ .

**Figure S5.** HSQC spectrum of ASPE in  $\text{CD}_3\text{OH}$ .

**Figure S6.** MALDI-TOF MS spectrum of ASPE.

**Figure S7.** The  $\text{C}^\alpha\text{H}-\text{C}^\alpha\text{H}$  region of TOCSY spectrum of ASPE showing the intra-residue scalar connectivities of six Pro and *N*-terminal residues.

**Figure S8.** The  $\text{C}^\alpha\text{H}-\text{C}^\alpha\text{H}$  region of NOESY spectrum of ASPE showing the  $d_{\alpha\alpha(i,i+1)}$  and  $d_{\alpha\delta(i,i+1)}$  connectivities of Pro residues.

**Figure S9.** Picture of the marine sponge *Asteropus* sp.

**Table S1.** Analysis of the possible disulfide bonding patterns in ASPE.

**Table S2.**  $^1\text{H}$  NMR Chemical shifts of ASPE.

**Table S3.**  $^{13}\text{C}$  NMR Chemical shifts of ASPE.

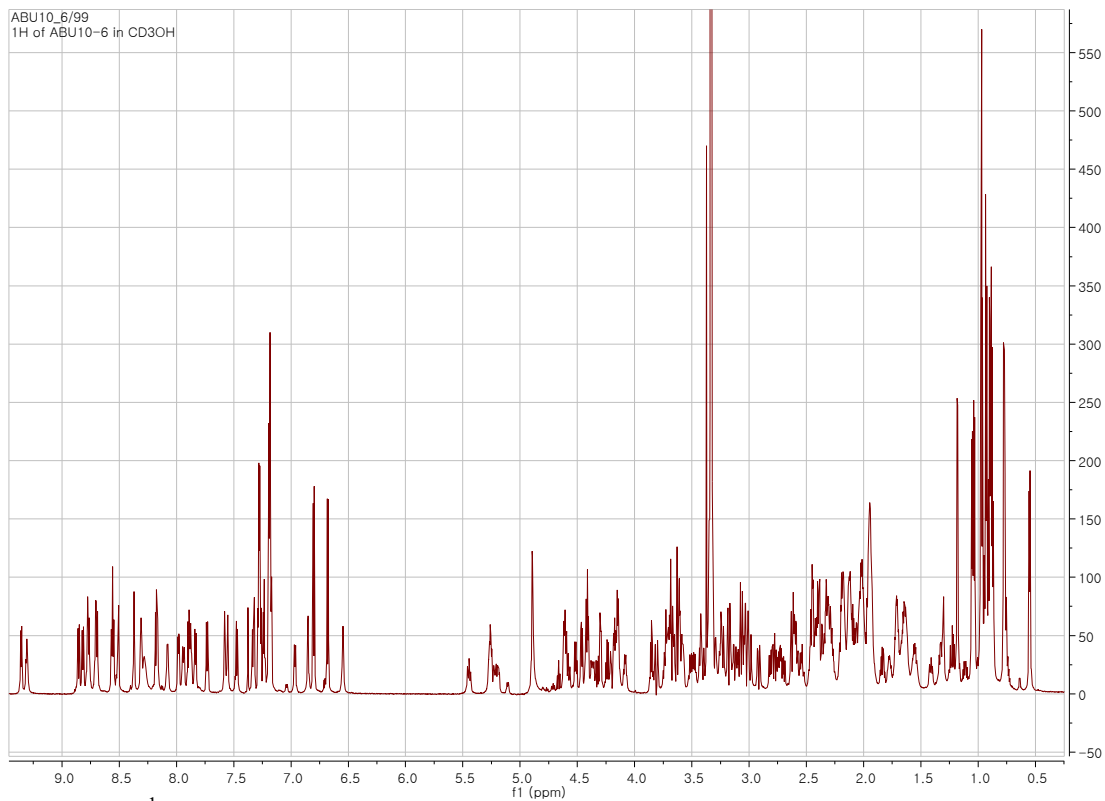

**Figure S1.**  $^1\text{H}$  NMR spectrum of ASPE in  $\text{CD}_3\text{OH}$  (900 MHz).

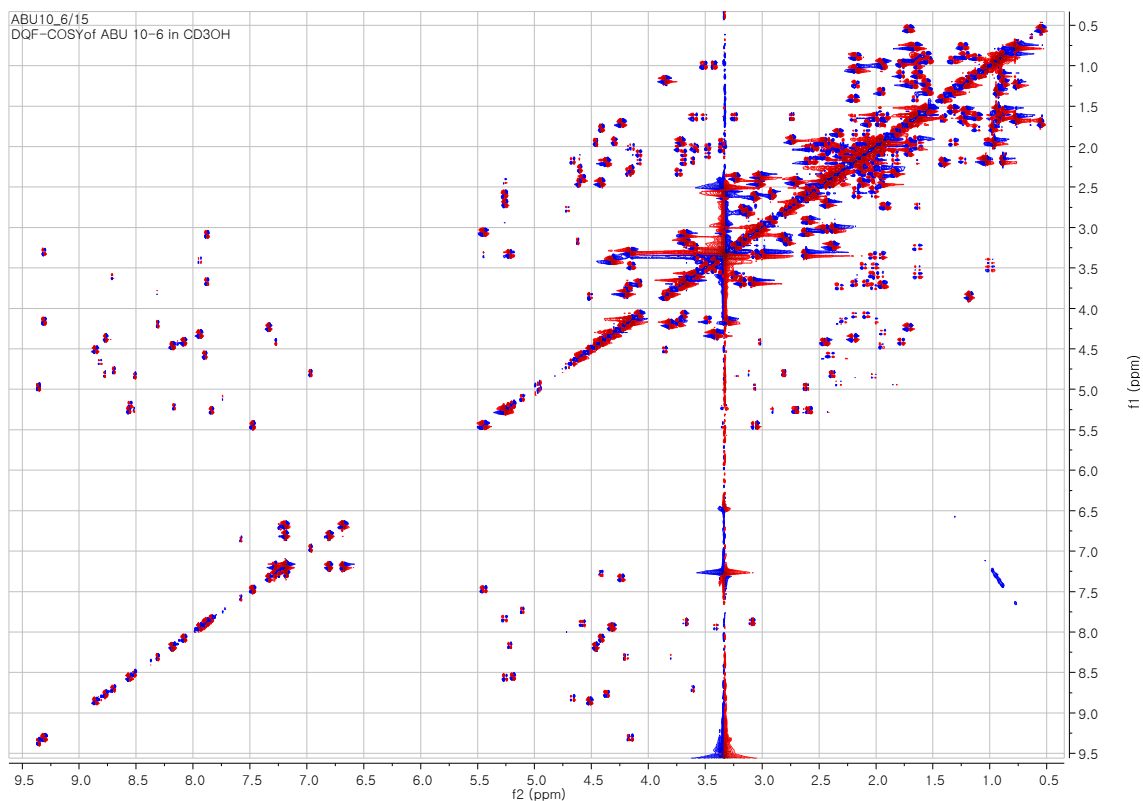

**Figure S2.** DQF-COSY spectrum of ASPE in  $\text{CD}_3\text{OH}$  (900 MHz)

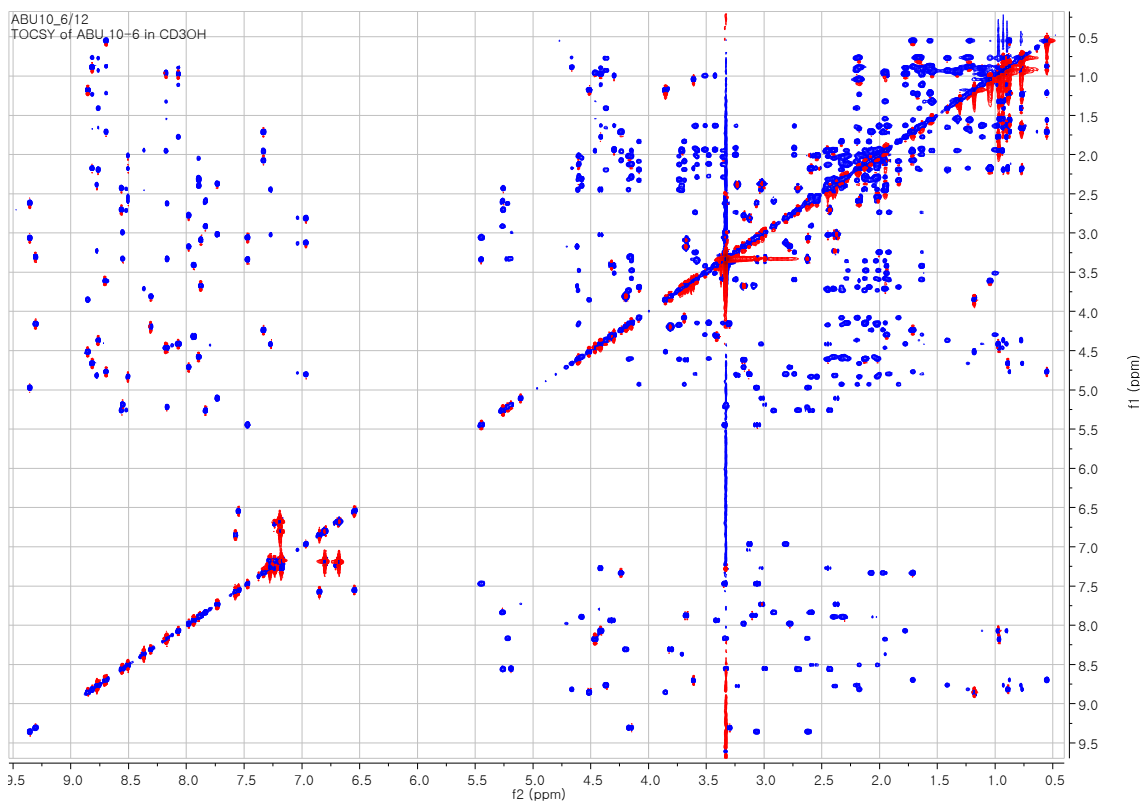

**Figure S3.** TOCSY spectrum of ASPE in CD<sub>3</sub>OH (900 MHz, mixing time = 80 ms).

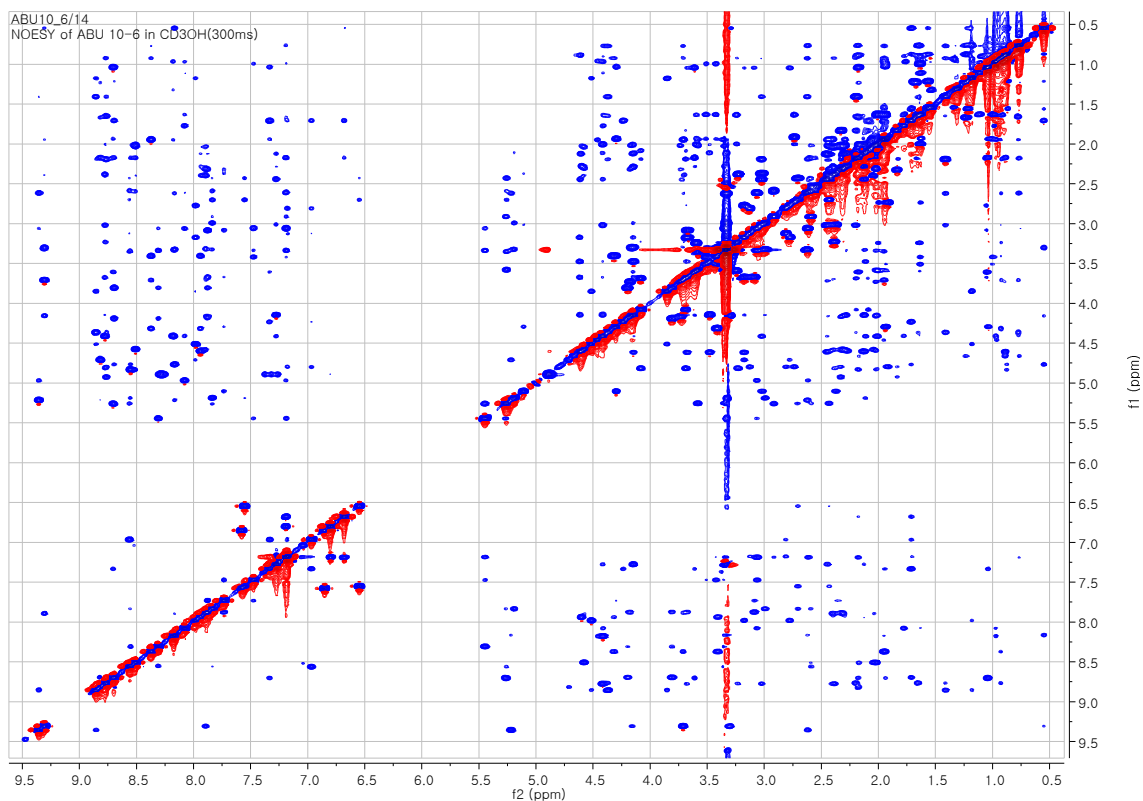

**Figure S4.** NOESY spectrum of ASPE in CD<sub>3</sub>OH (900 MHz, mixing time = 300 ms).

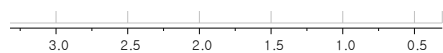

**Figure S5.** HSQC spectrum of ASPE in CD<sub>3</sub>OH (900 MHz).

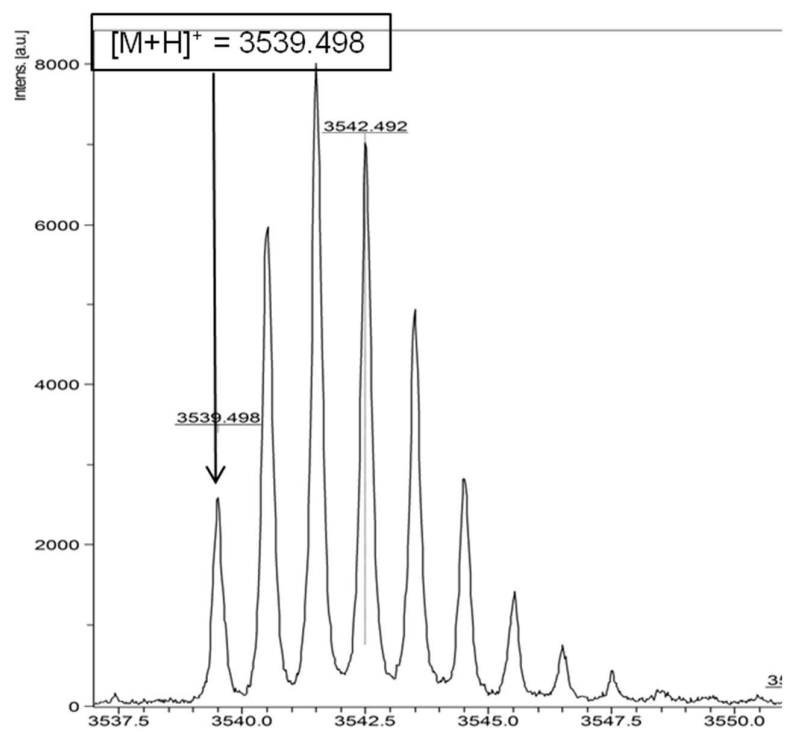

**Figure S6.** MALDI-TOF MS spectrum of ASPE.

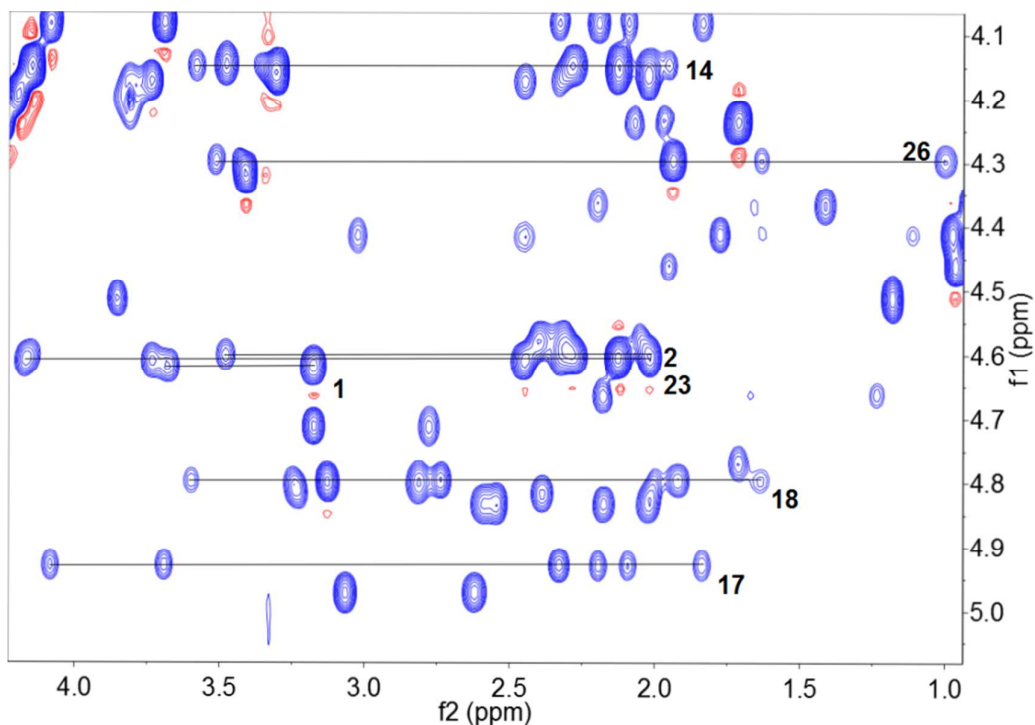

**Figure S7.** The  $C^{\alpha}H-C^{\alpha}H$  region of TOCSY spectrum (in  $CD_3OH$ , mixing time = 80 ms, 900 MHz) of ASPE showing the intra-residue scalar connectivities of six Pro and *N*-terminal residues.

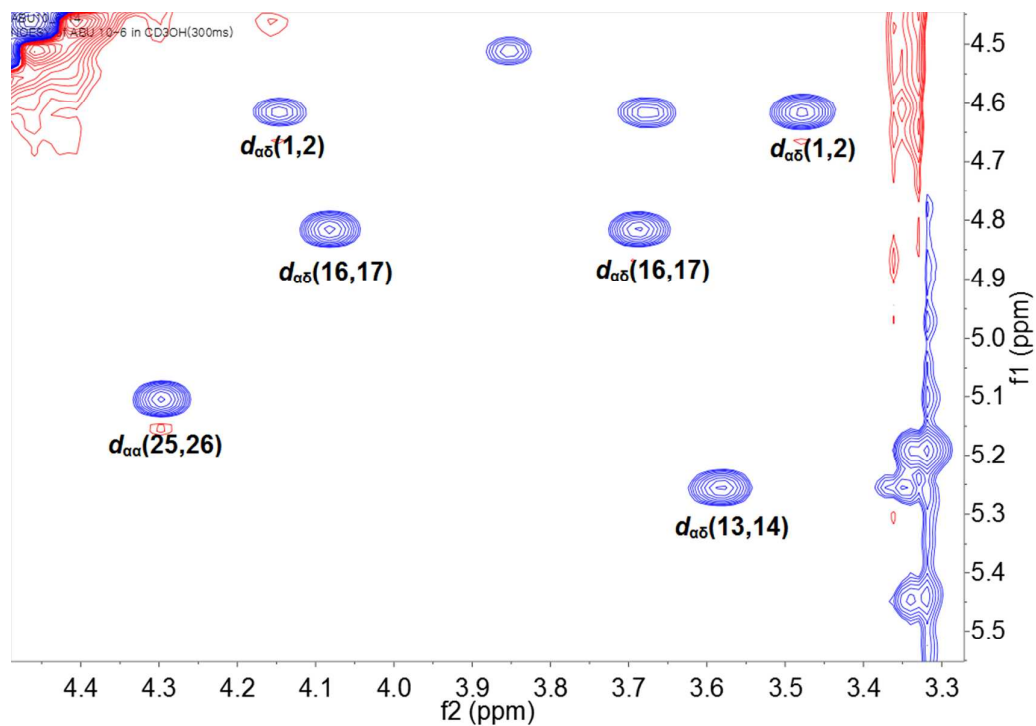

**Figure S8.** The  $C^{\alpha}H-C^{\alpha}H$  region of NOESY spectrum (in  $CD_3OH$ , mixing time = 300 ms, 900 MHz) of ASPE showing the  $d_{\alpha\alpha(i-1,i)}$  and  $d_{\alpha\delta(i-1,i)}$  connectivities of Pro residues.

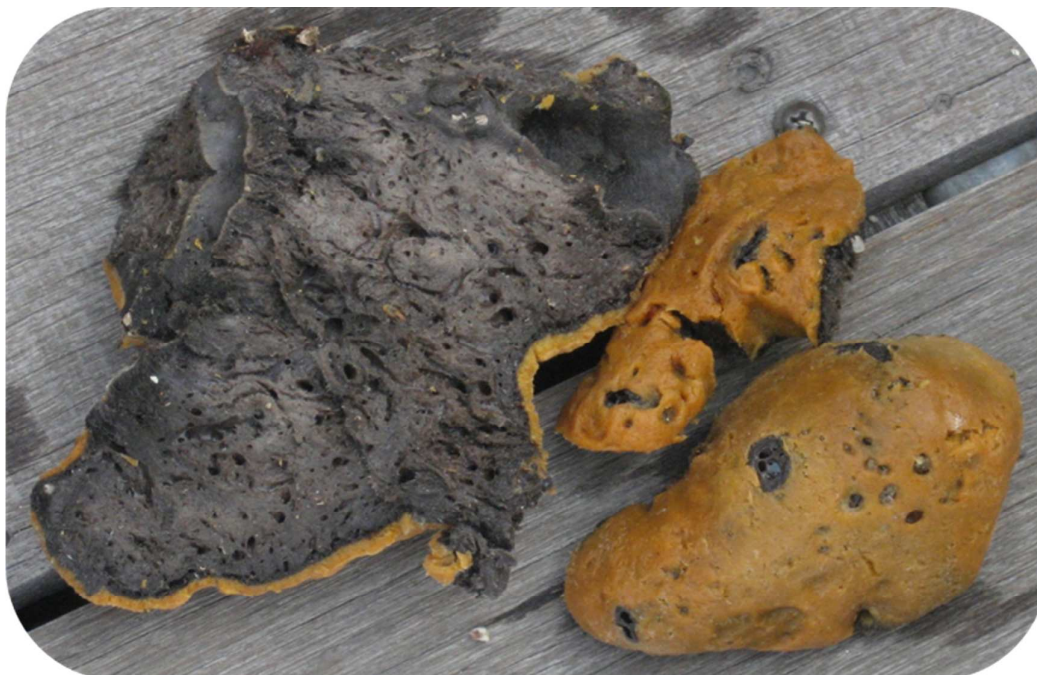

**Figure S9.** Picture of the marine sponge *Asteropus* sp.

**Table S1.** Analysis of the possible disulfide bonding patterns in ASPE.

| Disulfide pattern | Mean distance (Å) <sup>a</sup> |
|-------------------|--------------------------------|
| 1-8               | 8.9 ± 1.6                      |
| 1-15              | 8.1 ± 0.3                      |
| <b>1-16</b>       | <b>2.8 ± 2.0</b>               |
| 1-21              | 11.0 ± 1.0                     |
| 1-30              | 8.6 ± 0.1                      |
| 8-15              | 3.0 ± 0.8                      |
| 8-16              | 10.1 ± 0.8                     |
| <b>8-21</b>       | <b>3.3 ± 1.5</b>               |
| 8-30              | 3.5 ± 1.2                      |
| 15-16             | 8.4 ± 0.2                      |
| 15-21             | 5.4 ± 0.4                      |
| <b>15-30</b>      | <b>1.8 ± 0.4</b>               |
| 16-21             | 12.4 ± 0.5                     |
| 16-30             | 8.8 ± 0.3                      |
| 21-30             | 6.1 ± 0.1                      |

<sup>a</sup> Mean S-S distances (Å) calculated from the 20 lowest energy structures without disulfide bond restraints

**Table S2.**  $^1\text{H}$  NMR Chemical Shifts of ASPE (in  $\text{CD}_3\text{OH}$ , 900 MHz).

| No. | Residue | NH   | $\text{C}^\alpha\text{H}$ | $\text{C}^\beta\text{H}$ | Others                                                                                                     |
|-----|---------|------|---------------------------|--------------------------|------------------------------------------------------------------------------------------------------------|
| 1   | Cys     |      | 4.61                      | 3.67, 3.17               |                                                                                                            |
| 2   | Pro     |      | 4.60                      | 2.28                     | $\text{C}^\gamma\text{H}_2$ 2.12, 2.01; $\text{C}^\delta\text{H}_2$ 4.15, 3.48                             |
| 3   | Gly     | 7.94 | 4.32, 3.41                |                          |                                                                                                            |
| 4   | Glu     | 8.37 | 3.71                      | 1.95                     | $\text{C}^\gamma\text{H}_2$ 2.46, 2.40                                                                     |
| 5   | Gly     | 9.31 | 4.16, 3.30                |                          |                                                                                                            |
| 6   | Glu     | 7.89 | 4.58                      | 2.40, 2.04               | $\text{C}^\gamma\text{H}_2$ 2.31                                                                           |
| 7   | Gln     | 8.51 | 4.83                      | 2.18, 2.02               | $\text{C}^\gamma\text{H}_2$ 2.60, 2.54; $\text{N}^\epsilon\text{H}_2$ 7.57, 6.85                           |
| 8   | Cys     | 8.55 | 5.19                      | 3.33, 2.99               |                                                                                                            |
| 9   | Asp     | 7.84 | 5.26                      | 2.91, 2.59               |                                                                                                            |
| 10  | Val     | 8.71 | 3.61                      | 2.18                     | $\text{C}^\gamma\text{H}_3$ 1.05, 1.04                                                                     |
| 11  | Glu     | 7.33 | 4.24                      | 1.71                     | $\text{C}^\gamma\text{H}_2$ 2.07, 1.96                                                                     |
| 12  | Phe     | 6.97 | 4.80                      | 3.13, 2.81               | $\text{C}^\delta\text{H}_2$ 7.18; $\text{C}^\epsilon\text{H}_2$ 7.28; $\text{C}^\zeta\text{H}$ 7.23        |
| 13  | Asn     | 8.56 | 5.26                      | 2.70, 2.43               | $\text{N}^\delta\text{H}_2$ 7.55, 6.55                                                                     |
| 14  | Pro     |      | 4.15                      | 2.29, 2.13               | $\text{C}^\gamma\text{H}_2$ 2.03, 1.95; $\text{C}^\delta\text{H}_2$ 3.58, 3.35                             |
| 15  | Cys     | 7.27 | 4.42                      | 3.02, 2.45               |                                                                                                            |
| 16  | Cys     | 8.78 | 4.82                      | 3.23, 2.39               |                                                                                                            |
| 17  | Pro     |      | 4.93                      | 2.33, 1.83               | $\text{C}^\gamma\text{H}_2$ 2.19, 2.09; $\text{C}^\delta\text{H}_2$ 4.08, 3.69                             |
| 18  | Pro     |      | 4.80                      | 2.74, 1.92               | $\text{C}^\gamma\text{H}_2$ 2.03, 1.63; $\text{C}^\delta\text{H}_2$ 3.59, 3.24                             |
| 19  | Leu     | 8.77 | 4.37                      | 2.20, 1.41               | $\text{C}^\gamma\text{H}$ 1.65; $\text{C}^\delta\text{H}_3$ 0.93, 0.77                                     |
| 20  | Thr     | 8.86 | 4.51                      | 3.85                     | $\text{C}^\gamma\text{H}_3$ 1.18                                                                           |
| 21  | Cys     | 7.99 | 4.71                      | 3.18, 2.78               |                                                                                                            |
| 22  | Ile     | 8.82 | 4.66                      | 2.17                     | $\text{C}^\gamma\text{H}_2$ 1.67, 1.23; $\text{C}^\gamma\text{H}_3$ 0.89; $\text{C}^\delta\text{H}_3$ 0.77 |
| 23  | Pro     |      | 4.61                      | 2.45, 2.13               | $\text{C}^\gamma\text{H}_2$ 2.32, 2.02; $\text{C}^\delta\text{H}_2$ 4.17, 3.73                             |
| 24  | Gly     | 7.88 | 3.67, 3.09                |                          |                                                                                                            |
| 25  | Asp     | 7.73 | 5.11                      | 3.02, 2.37               |                                                                                                            |
| 26  | Pro     |      | 4.30                      | 1.94                     | $\text{C}^\gamma\text{H}_2$ 1.63, 1.00; $\text{C}^\delta\text{H}_2$ 3.51, 3.42                             |
| 27  | Tyr     | 7.47 | 5.45                      | 3.34, 3.06               | $\text{C}^\delta\text{H}_2$ 7.18; $\text{C}^\epsilon\text{H}_2$ 6.80                                       |
| 28  | Gly     | 8.31 | 4.20, 3.81                |                          |                                                                                                            |
| 29  | Ile     | 8.70 | 4.77                      | 1.71                     | $\text{C}^\gamma\text{H}_2$ 1.56, 1.22; $\text{C}^\gamma\text{H}_3$ 0.55; $\text{C}^\delta\text{H}_3$ 0.88 |
| 30  | Cys     | 8.17 | 5.22                      | 3.33, 2.62               |                                                                                                            |
| 31  | Tyr     | 9.36 | 4.97                      | 3.06, 2.62               | $\text{C}^\delta\text{H}_2$ 7.19; $\text{C}^\epsilon\text{H}_2$ 6.68                                       |
| 32  | Ile     | 8.07 | 4.41                      | 1.77                     | $\text{C}^\gamma\text{H}_2$ 1.64, 1.11; $\text{C}^\gamma\text{H}_3$ 0.97; $\text{C}^\delta\text{H}_3$ 0.90 |
| 33  | Ile     | 8.18 | 4.46                      | 1.95                     | $\text{C}^\gamma\text{H}_2$ 1.54, 1.32; $\text{C}^\gamma\text{H}_3$ 0.97; $\text{C}^\delta\text{H}_3$ 0.93 |



**Table S3.**  $^{13}\text{C}$  NMR Chemical Shifts of ASPE Assigned on the Basis of HSQC Spectroscopy (in  $\text{CD}_3\text{OH}$ , 900 MHz).

| No | Residue | $\text{C}^\alpha$ | $\text{C}^\beta$ | $\text{C}^\gamma$ | Others                                                                    |
|----|---------|-------------------|------------------|-------------------|---------------------------------------------------------------------------|
| 1  | Cys     | 49.3              | 38.6             |                   |                                                                           |
| 2  | Pro     | 60.0              | 30.2             | 25.4              | $\text{C}^\delta$ 48.0                                                    |
| 3  | Gly     | 39.4              |                  |                   |                                                                           |
| 4  | Glu     | 54.6              | 24.1             | 29.4              |                                                                           |
| 5  | Gly     | 42.8              |                  |                   |                                                                           |
| 6  | Glu     | 51.8              | 28.0             | 31.2              |                                                                           |
| 7  | Gln     | 54.0              | 27.6             | 31.9              |                                                                           |
| 8  | Cys     | 50.8              | 48.5             |                   |                                                                           |
| 9  | Asp     | 49.4              | 37.9             |                   |                                                                           |
| 10 | Val     | 63.2              | 29.3             | 19.4, 17.1        |                                                                           |
| 11 | Glu     | 54.2              | 26.5             | 29.9              |                                                                           |
| 12 | Phe     | 55.8              | 39.2             |                   | $\text{C}^\delta$ 129.0, $\text{C}^\epsilon$ 128.3 $\text{C}^\zeta$ 126.9 |
| 13 | Asn     | 48.9              | 36.2             |                   |                                                                           |
| 14 | Pro     | 60.0              | 29.4             | 24.2              | $\text{C}^\delta$ 47.3                                                    |
| 15 | Cys     | 53.2              | 40.1             |                   |                                                                           |
| 16 | Cys     | 49.6              | 35.2             |                   |                                                                           |
| 17 | Pro     | 58.9              | 28.1             | 25.1              | $\text{C}^\delta$ 47.0                                                    |
| 18 | Pro     | 61.0              | 28.7             | 21.5              | $\text{C}^\delta$ 45.7                                                    |
| 19 | Leu     | 53.8              | 39.0             | 26.3              | $\text{C}^\delta$ 23.2, 22.3                                              |
| 20 | Thr     | 58.3              | 68.3             | 18.4              |                                                                           |
| 21 | Cys     | 52.3              | 37.2             |                   |                                                                           |
| 22 | Ile     | 54.7              | 38.2             | 24.2, 13.4        | $\text{C}^\delta$ 9.4                                                     |
| 23 | Pro     | 61.8              | 31.4             | 22.7              | $\text{C}^\delta$ 47.3                                                    |
| 24 | Gly     | 44.5              |                  |                   |                                                                           |
| 25 | Asp     | 48.1              | 35.9             |                   |                                                                           |
| 26 | Pro     | 60.9              | 31.7             | 20.5              | $\text{C}^\delta$ 47.6                                                    |
| 27 | Tyr     | 54.7              | 37.9             |                   | $\text{C}^\delta$ 129.6, $\text{C}^\epsilon$ 115.5                        |
| 28 | Gly     | 44.3              |                  |                   |                                                                           |
| 29 | Ile     | 56.3              | 38.6             | 25.1, 14.8        | $\text{C}^\delta$ 9.3                                                     |
| 30 | Cys     | 52.8              | 39.0             |                   |                                                                           |
| 31 | Tyr     | 54.8              | 40.6             |                   | $\text{C}^\delta$ 130.7, $\text{C}^\epsilon$ 114.8                        |
| 32 | Ile     | 58.1              | 36.9             | 25.7, 14.2        | $\text{C}^\delta$ 10.5                                                    |
| 33 | Ile     | 56.9              | 36.9             | 24.9, 14.9        | $\text{C}^\delta$ 10.6                                                    |
